# Supplementary material
Source: PubMed Central journal article supplement (PMC428452)

## Control / Nitrosative stress

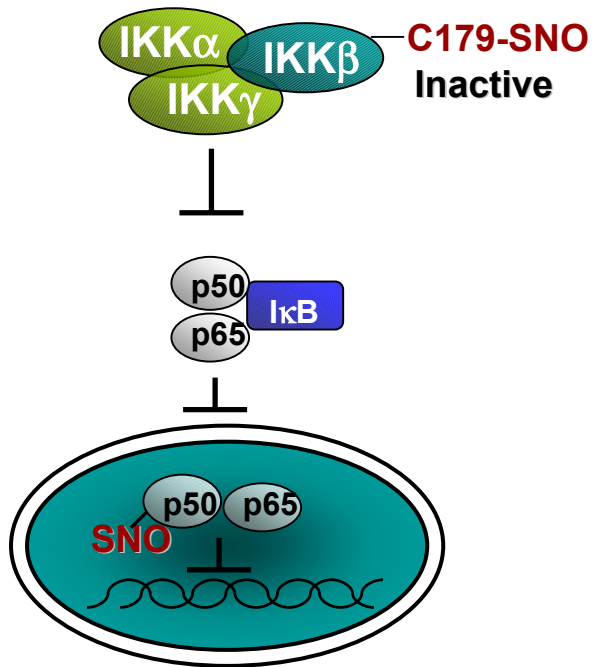

## Cytokine stimulation / NOS inhibition

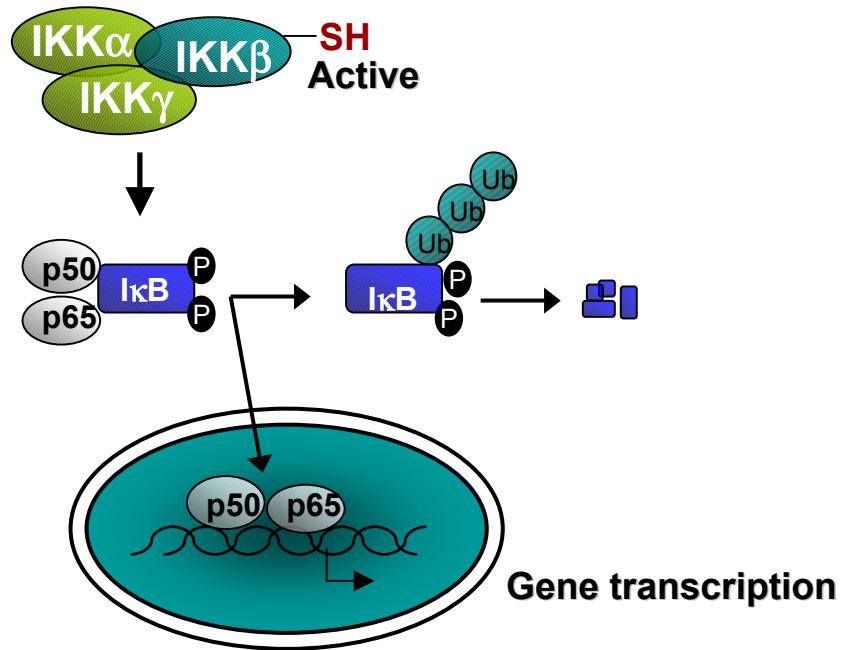

Supplement: pnas_101_24_8945__1.pdf [file pnas_101_24_8945__1.pdf]
